# Supplementary material
Source: PubMed Central journal article supplement (PMC4136132)
Supplement: JCM.00049-14_zjm999093582so1.pdf [file JCM.00049-14_zjm999093582so1.pdf]

**Table S1. 83 mold isolates included in the strain collection.**

| <b>Organism<sup>a</sup></b>         | <b>No. of isolates</b> | <b>No. of reference entries in Bruker database<sup>b</sup></b> |
|-------------------------------------|------------------------|----------------------------------------------------------------|
| <i>Acremonium</i> sp.               | 3                      | 1                                                              |
| <i>Aspergillus flavus</i>           | 3                      | 7                                                              |
| <i>Aspergillus fumigatus</i>        | 3                      | 12                                                             |
| <i>Aspergillus glaucus</i>          | 3                      | 3                                                              |
| <i>Aspergillus nidulans</i>         | 3                      | 9                                                              |
| <i>Aspergillus niger</i>            | 3                      | 12                                                             |
| <i>Aspergillus ochraceus</i>        | 3                      | 4                                                              |
| <i>Aspergillus terreus</i>          | 3                      | 10                                                             |
| <i>Aspergillus versicolor</i>       | 3                      | 11                                                             |
| <i>Beauveria bassiana</i>           | 3                      | 1                                                              |
| <i>Chrysosporium keratinophilum</i> | 3                      | 3                                                              |
| <i>Fusarium dimerum</i>             | 1                      | 3                                                              |
| <i>Fusarium oxysporum</i>           | 2                      | 6                                                              |
| <i>Fusarium solani</i>              | 3                      | 9                                                              |
| <i>Lichtheimia corymbifera</i>      | 3                      | 11                                                             |
| <i>Mucor plumbeus</i>               | 1                      | 0                                                              |
| <i>Mucor racemosus</i>              | 1                      | 0                                                              |
| <i>Mucor</i> sp.                    | 1                      | 5                                                              |
| <i>Paecilomyces lilacinus</i>       | 3                      | 4                                                              |
| <i>Paecilomyces</i> sp.             | 3                      | 11                                                             |
| <i>Paecilomyces variotii</i>        | 3                      | 5                                                              |
| <i>Penicillium citrinum</i>         | 1                      | 3                                                              |
| <i>Penicillium olsonii</i>          | 1                      | 1                                                              |
| <i>Penicillium rolfsii</i>          | 1                      | 0                                                              |
| <i>Penicillium</i> sp.              | 2                      | 67                                                             |
| <i>Rhizopus</i> sp.                 | 3                      | 15                                                             |
| <i>Scedosporium apiospermum</i>     | 3                      | 4                                                              |
| <i>Scedosporium prolificans</i>     | 3                      | 2                                                              |
| <i>Schizophyllum commune</i>        | 3                      | 4                                                              |
| <i>Scopulariopsis brevicaulis</i>   | 3                      | 7                                                              |
| <i>Scopulariopsis brumptii</i>      | 1                      | 1                                                              |
| <i>Scopulariopsis candida</i>       | 1                      | 0                                                              |
| <i>Scopulariopsis cinerea</i>       | 1                      | 0                                                              |
| <i>Trichoderma harzianum</i>        | 1                      | 0                                                              |
| <i>Trichoderma citroviride</i>      | 1                      | 0                                                              |
| <i>Trichoderma</i> sp.              | 1                      | 3                                                              |
| <i>Trichurus</i> sp.                | 3                      | 1                                                              |
| <b>Total</b>                        | <b>83</b>              | <b>235</b>                                                     |

<sup>a</sup> Identification by phenotypic characterization and sequence analysis of the internal transcribed spacer (ITS) region.

<sup>b</sup> Number of reference spectra included in the Filamentous Fungi Library 1.0 (Bruker Daltonik).
